# Supplementary material for: Increasing Mechanical Strength of Gelatin Hydrogels by Divalent Metal Ion Removal
Source: PubMed Central journal article supplement (PMC3988488; doi:10.1038/srep04706), 2014-04-16

# Increasing Mechanical Strength of Gelatin Hydrogels by Divalent Metal Ion Removal

Qi Xing<sup>a</sup>, Keegan Yates<sup>a</sup>, Caleb Vogt<sup>a</sup>, Zichen Qian<sup>a</sup>, Megan C. Frost<sup>b</sup>, Feng Zhao<sup>\*a</sup>

Supplementary information:

Supplemental Figure 1. EDS of lyophilized unpurified (A) and purified (B) gelatin hydrogels.

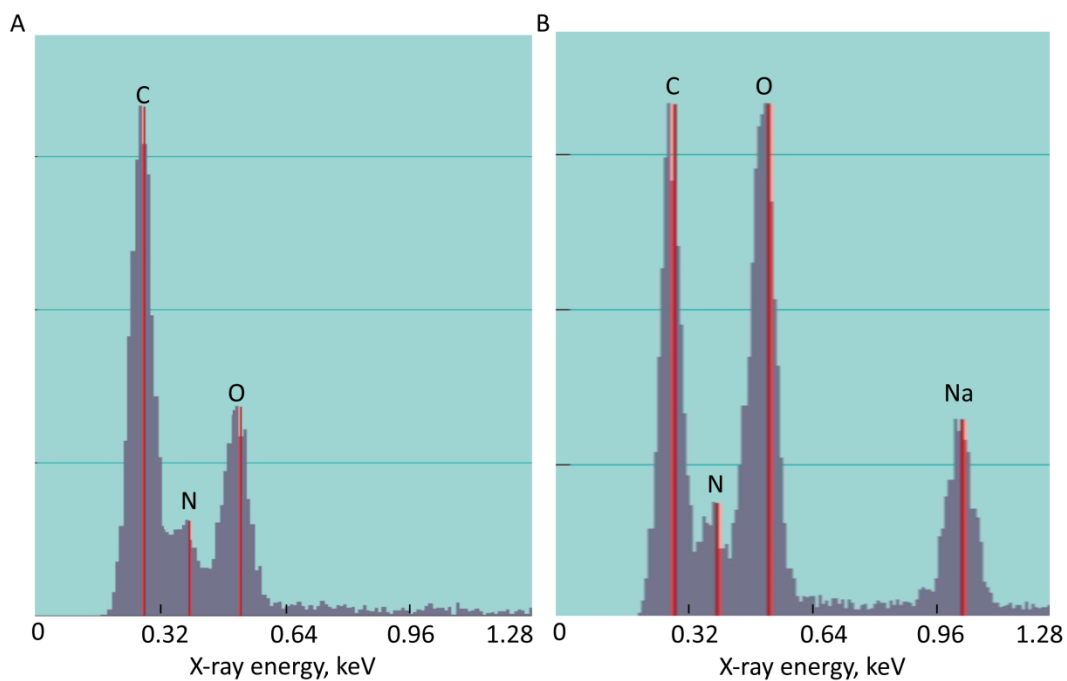

Supplement: srep04706-s1.pdf [file srep04706-s1.pdf]
